# Supplementary material for: Nitrogen cycling in pastoral livestock systems in Sub‐Saharan Africa: knowns and unknowns
Source: PubMed Central journal article supplement (PMC8459270; doi:10.1002/eap.2368), 2021-06-10
Supplement: EAP-31-e02368-s001.pdf [file EAP-31-e02368-s001.pdf]

**Supporting Information.** Carbonell, V., L. Merbold, E. Díaz-Pinés, T. Dowling, and K. Butterbach-Bahl. 2021. Nitrogen cycling in pastoral livestock systems in Sub-Saharan Africa: knowns and unknowns. Ecological Applications.

**Appendix S1.** Additional tables and figures mentioned in the main text.

**Table S1.** Keywords used in literature search. Organized by main keywords and N flow/stock specific keywords. Number of results for each category are indicated in parenthesis.

| Main keywords                         | N inputs and outputs/export | Soil and vegetation nitrogen stocks | N emissions from bomas and waterholes |
|---------------------------------------|-----------------------------|-------------------------------------|---------------------------------------|
| Nitrogen AND savanna AND Africa (369) | BNF (17)                    | Soil N stocks (58)                  | Ammonia manure (3)                    |
|                                       | Deposition (77)             | Vegetation N stocks (34)            | Nitrous oxide manure (1)              |
|                                       | Nitrous oxide (56)          | Biomass (25)                        | N <sub>2</sub> manure (5)             |
|                                       | Ammonia (65)                |                                     | Bomas (6)                             |
|                                       | Leaching (74)               |                                     | Kraals (11)                           |
|                                       | Nitric oxide (56)           |                                     | Enclosures (7)                        |
|                                       | N <sub>2</sub> (99)         |                                     | Watering point (21)                   |

**Table S2.** Mean  $\pm$  standard deviation (sd) N stocks (Mg N ha<sup>-1</sup>) by soil type for 0-100 cm depth.

|                                      | Soil type* | # profiles | 0-100 cm      |
|--------------------------------------|------------|------------|---------------|
| N stocks<br>(Mg N ha <sup>-1</sup> ) | Cambisols  | 4          | 6.2 $\pm$ 2.1 |
|                                      | Ferrasols  | 2          | 6.5 $\pm$ 0.5 |
|                                      | Gleysols   | 16         | 5.6 $\pm$ 2.5 |
|                                      | Luvisols   | 15         | 6.8 $\pm$ 4.6 |
|                                      | Arenosols  | 68         | 4.9 $\pm$ 4.0 |
|                                      | Regosols   | 53         | 4.3 $\pm$ 3.3 |
|                                      | Vertisols  | 20         | 5.3 $\pm$ 2.3 |
|                                      | all soils  | 178        | 5.0 $\pm$ 3.6 |

\*(IUSS Working Group WRB, 2014)

**Table S3.** Summary table of land cover percentage (%) in a pastoral farm in semiarid Kenya.

| Class                 | Land cover (%) |
|-----------------------|----------------|
| Canopy vegetation (%) | 9.0            |
| Other vegetation (%)  | 79.6           |
| Surface water (%)     | 0.2            |
| Exposed soil (%)      | 11.2           |

Values derived from random forest classification on Sentinel 2 imagery. Rand accuracy=0.97, indicating that 97% of test pixels are classified correctly using the model found by the evaluation of the training pixels.

**Table S4.** Nitrogen fluxes from pasture in pastoral systems in sub-Saharan Africa.

| Flux                                       | N flux<br>(kg N ha <sup>-1</sup> a <sup>-1</sup> )          | Region                                                   | Source                                                | Method                                                                                                                                                                                                               |
|--------------------------------------------|-------------------------------------------------------------|----------------------------------------------------------|-------------------------------------------------------|----------------------------------------------------------------------------------------------------------------------------------------------------------------------------------------------------------------------|
| BNF                                        | 16.4, 30.2 and 44 <sup>a</sup>                              | Global tropical savanna ecosystem                        | Cleveland et al. (1999)                               | Calculated as the average of values from literature                                                                                                                                                                  |
|                                            | 18.6                                                        | African savanna                                          | Chen et al. (2010)                                    | Estimated from Cleveland et al. (1999) corrected according to Fischer et al. (2008)                                                                                                                                  |
|                                            | 20-60                                                       | Tropical savanna ecosystem                               | Houlton et al. (2008)                                 | Applied model to data from literature                                                                                                                                                                                |
|                                            | 30                                                          | Savanna in West Africa                                   | Robertson and Roswall (1986)                          | Sum of symbiotic, algal and other BNF values from publications                                                                                                                                                       |
|                                            | <b>7.4 ± 4.3</b><br>(trees),<br><b>0.2 ± 0.1</b><br>(herbs) | <i>Tanzanian savanna /virtual farm in Kenyan savanna</i> | Cech et al. (2010)                                    | Measured biomass data and tissue N concentration for trees and herbs                                                                                                                                                 |
| Atmospheric N deposition                   | 7.4 (1.0)                                                   | Savanna in West Africa                                   | Delon et al. (2012)                                   | Surface measurements, satellite imagery and modelling wet and dry deposition                                                                                                                                         |
|                                            | 6 (1.8)                                                     | Savanna in West Africa                                   | Galy-Lacaux and Delon (2014)                          | Data from long-term measurements from 10 IDAF project stations.                                                                                                                                                      |
|                                            | <b>3.1 ± 2.4</b>                                            | <i>virtual farm in Kenyan savanna</i>                    | Dentener (2006)                                       | Values in pastoral regions in SSA extracted from global data set generated using a model for wet and dry deposition                                                                                                  |
| Ammonia (NH <sub>3</sub> ) emissions       | -0.44                                                       | Savanna in Senegal                                       | Delon et al. (2017)                                   | Field observations (dynamic Teflon chambers)                                                                                                                                                                         |
|                                            | 8.4 ± 3.8, 12.5 ± 5.9 <sup>b</sup>                          | Savanna in West Africa                                   | Delon et al. (2010)                                   | Calculated from Schlecht et al (1995) data on livestock N excretion and applying 30% and 50% vol.rate                                                                                                                |
|                                            | <b>0.6 ± 0.2</b>                                            | <i>virtual farm in Kenyan savanna</i>                    | Schlecht et al. (1995); IPCC (2019) *                 | Calculated from Schlecht et al (1995) data on livestock N excretion and applying 15.3% vol.rate                                                                                                                      |
| Nitrous oxide (N <sub>2</sub> O) emissions | 0.25 - 0.5                                                  | Savanna in Zimbabwe                                      | Rees et al. (2006)                                    | Static greenhouse gas chambers and denitrification-decomposition model (DNDC)                                                                                                                                        |
|                                            | 0.03 – 0.27                                                 | Savanna in South Africa                                  | Scholes et al. (1997)                                 | manual GHG chambers                                                                                                                                                                                                  |
|                                            | 0.52, 0.67                                                  | Savanna in Burkina Faso                                  | Brümmer et al. (2008)                                 | manual GHG chambers                                                                                                                                                                                                  |
|                                            | <b>0.4 ± 0.2<sup>c</sup></b>                                | <i>virtual farm in Kenyan savanna</i>                    | Rees et al. (2006); Scholes et al. (1997); IPCC(2019) | Mean value of the three studies plus manure left on pastures*                                                                                                                                                        |
| Dinitrogen (N <sub>2</sub> ) emissions     | 0.99                                                        | Savanna in Zimbabwe                                      | Rees et al. (2006)                                    | Modelled (using DNDC) and measured data                                                                                                                                                                              |
|                                            | <b>0.5 ± 0.2<sup>d</sup></b>                                | <i>virtual farm in Kenyan savanna</i>                    | Schlesinger (2009); Jarvis and Pain (1994);           | No information for savanna systems. We used general assumptions as outlined in two publications: soil N <sub>2</sub> O emission (Schlesinger, 2009) and 3x manure N <sub>2</sub> O emissions (Jarvis and Pain, 1994) |

|                                       |                                                     |                                                    |                                                                                                                    |                                                                                                               |
|---------------------------------------|-----------------------------------------------------|----------------------------------------------------|--------------------------------------------------------------------------------------------------------------------|---------------------------------------------------------------------------------------------------------------|
|                                       | 1.5-1.6                                             | Savanna in West Africa                             | Galy-Lacaux and Delon (2014)                                                                                       | ISBA (Interactions between Soil, Biosphere, and Atmosphere) model                                             |
|                                       | 1.4 ± 0.3                                           | Savanna in West Africa                             | Delon et al. (2012)                                                                                                | ISBA model                                                                                                    |
|                                       | 1.5                                                 | Savanna in South Africa                            | Otter et al. (1999)                                                                                                | Calculated from field observations and the Hot Wet model by Scholes and Carter (Personal communication, 1998) |
| Nitric oxide (NO) emissions           | 1.5                                                 | Savanna in South Africa                            | Scholes et al. (1997)                                                                                              | manual GHG chambers                                                                                           |
|                                       | 0.1 - 2.0 <sup>e</sup> ; 1.8 - 10.7 <sup>f</sup>    | Savanna in South Africa                            | Levine et al. (1996)                                                                                               | manual GHG chambers                                                                                           |
|                                       | 0.1 <sup>e</sup> ; 1.4 <sup>f</sup>                 | Savanna in Zimbabwe                                | Meixner et al. (1997b)                                                                                             | manual GHG chambers                                                                                           |
|                                       | <b>0.5 ± 0.1<sup>e</sup>; 2.2 ± 0.4<sup>f</sup></b> | <i>virtual farm in Kenyan savanna</i>              | Meixner et al. (1997b); Levine et al. (1996); Otter et al. (1999)*                                                 | Average for dry and wet seasons from literature                                                               |
| NO <sub>3</sub> <sup>-</sup> leaching | 2-3                                                 | Savanna in Zimbabwe                                | Rees et al. (2006)                                                                                                 | Field observations using static and closed plastic chambers                                                   |
|                                       | 5.1 <sup>g</sup>                                    | Savanna in West Africa                             | (Robertson and Rosswall 1986)                                                                                      | Estimated from literature values based on Niger River fluxes                                                  |
|                                       | <b>2.6 ± 0.5<sup>h</sup></b>                        | <i>virtual farm in Kenyan savanna</i>              | Rees et al. (2006); IPCC (2019)                                                                                    | Mean value from Rees et al. (2006) plus N leached from manure left on pasture as 3.5% of N excreted           |
| DON leaching                          | <b>1.1±0.2</b>                                      | <i>Grasslands / virtual farm in Kenyan savanna</i> | Siemens and Kaupejohann 2002; Wachendorf et al. 2005; Cai and Akiyama 2016                                         | Calculated as 30 % of total N leached, from NO <sub>3</sub> <sup>-</sup> leached as the remaining 70 %        |
| N milk and meat offtake               | <b>0.1</b>                                          | <i>virtual farm in Kenyan savanna</i>              | Otte and Chilonda(2002); Rufino et al. (2006); Farmer and Mbwika(2012); Syrstad (1993); Satter and Roffler (1975)* | Calculated from published values, with milk and meat offtake, N and protein partitioning and cattle density   |

<sup>a</sup> estimations for 5%, 15% and 25% of tree cover

<sup>b</sup> NH<sub>3</sub> volatilization rates of 30% and 50% of added/deposited N

<sup>c</sup> Result from adding our calculations of N<sub>2</sub>O emitted from manure left on pasture (0.008±0.002 kg N ha<sup>-1</sup> a<sup>-1</sup>) to mean value from literature for N<sub>2</sub>O emissions from savanna soils (0.43±0.22 kg N ha<sup>-1</sup> a<sup>-1</sup>)

<sup>d</sup> N<sub>2</sub>O:(N<sub>2</sub>+N<sub>2</sub>O) ratio of 0.5. Result from adding N<sub>2</sub> emitted from pastures (0.43±0.22 kg N ha<sup>-1</sup> a<sup>-1</sup>) to N<sub>2</sub> emitted from manure left on pasture (0.024±0.0006 kg N ha<sup>-1</sup> a<sup>-1</sup>)

<sup>e</sup> dry season

<sup>f</sup> wet season

<sup>g</sup> Includes N lost as leaching, runoff and erosion

<sup>h</sup> Result from adding N leached from pasture (2.5±0.5 kg N ha<sup>-1</sup> a<sup>-1</sup>) (Rees et al, 2006) to N leached from manure left on pasture (0.1±0.0 kg N ha<sup>-1</sup> a<sup>-1</sup>) (IPCC (2019).

\* Calculated from excretion rates for dry / wet seasons (Table 7)

**Table S5.** Nitrogen fluxes (mean  $\pm$  sd) in bomas and piospheres for the virtual farm in Kenya (10000 ha). All values in kg N ha<sup>-1</sup> a<sup>-1</sup>, calculated from excretion rates for dry and wet season respectively (Table 7)

| Flux                                                       | N flux value                  | Source                                                                     | Method                                                                                                                               |
|------------------------------------------------------------|-------------------------------|----------------------------------------------------------------------------|--------------------------------------------------------------------------------------------------------------------------------------|
| Ammonia (NH <sub>3</sub> ) volatilization from bomas       | 14760 $\pm$ 7380 <sup>a</sup> | Schlecht et al. (1995);<br>Delon et al. (2010); IPCC (2006)                | Calculated from Schlecht et al (1998) data on livestock N excretion and applying 30% vol.rate                                        |
| Nitrous oxide (N <sub>2</sub> O) emissions from bomas      | 24.8 $\pm$ 6.8                | Schlecht et al. (1995); Zhu et al. (2019)                                  | Calculated from Schlecht et al (1998) data on livestock N excretion and applying 0.14% and vol.rate                                  |
| Dinitrogen (N <sub>2</sub> ) emissions from bomas          | 2952 $\pm$ 813                | Jarvis and Pain (1994)                                                     | Calculated as 6% of excretion or three times higher than N <sub>2</sub> O emissions                                                  |
| NO <sub>3</sub> <sup>-</sup> leaching from bomas           | 1732 $\pm$ 473                | IPCC (2019)                                                                | 3.5% of N excreted                                                                                                                   |
| DON leaching from bomas                                    | 742 $\pm$ 203                 | Siemens and Kaupejohann 2002; Wachendorf et al. 2005; Cai and Akiyama 2016 | Calculated as 30 % of total N leached, from NO <sub>3</sub> <sup>-</sup> leached as the remaining 70 %                               |
| Ammonia (NH <sub>3</sub> ) volatilization from piospheres  | 34 $\pm$ 17                   | Schlecht et al. (1995); IPCC (2019)                                        | Calculated from Schlecht et al (1998) data on livestock N excretion and applying 15.3% vol.rate                                      |
| Nitrous oxide (N <sub>2</sub> O) emissions from piospheres | 0.8 $\pm$ 0.2 <sup>b</sup>    | Schlecht et al. (1995); IPCC (2019)                                        | Calculated from Schlecht et al (1998) data on livestock N excretion and applying 0.2% of N excreted plus N <sub>2</sub> O from soils |
| Dinitrogen (N <sub>2</sub> ) emissions from piospheres     | 1.7 $\pm$ 0.5 <sup>c</sup>    | Schlesinger (2009); Jarvis and Pain (1994)                                 | Same N <sub>2</sub> O value from soils and three times higher than N <sub>2</sub> O from manure left on pasture                      |
| Nitric oxide (NO) emissions from piospheres                | 1.1 $\pm$ 0.2                 | Meixner et al. (1997b); Levine et al. (1996); Otter et al. (1999)          | NO emissions rate from soils (Table 6)                                                                                               |
| NO <sub>3</sub> <sup>-</sup> leaching from piospheres      | 10.2 $\pm$ 8.2 <sup>d</sup>   | IPCC (2019)                                                                | Calculated as 3.5% of N excreted plus leaching from pasture                                                                          |
| DON leaching from piospheres                               | 4.4 $\pm$ 3.5                 | Siemens and Kaupejohann 2002; Wachendorf et al. 2005; Cai and Akiyama 2016 | Calculated as 30 % of total N leached, from NO <sub>3</sub> <sup>-</sup> leached as the remaining 70 %                               |

<sup>a</sup> IPCC 2006 Guidelines for national Greenhouse gas inventories and the 2019 refinement to the 2006 IPCC report values for nitrogen loss due volatilization of NH<sub>3</sub> and NO<sub>x</sub>, assuming that most N volatilized (~93%) occurs in form of NH<sub>3</sub>, the rest 7% is estimated to occur as NO<sub>x</sub>.

<sup>b</sup> Result from adding our calculations of N<sub>2</sub>O emitted from manure left on pasture (piospheres soil) (0.4 $\pm$ 0.1 kg N ha<sup>-1</sup> a<sup>-1</sup>) to mean value from literature for N<sub>2</sub>O emissions from savanna soils (0.43 $\pm$ 0.22 kg N ha<sup>-1</sup> a<sup>-1</sup>)

<sup>c</sup> Result from adding N<sub>2</sub> emitted from soils ( $0.5 \pm 0.2$  kg N ha<sup>-1</sup> a<sup>-1</sup>) to N<sub>2</sub> emitted from manure left on pasture ( $1.2 \pm 0.3$  kg N ha<sup>-1</sup> a<sup>-1</sup>)

<sup>d</sup> Result from adding N leached from pasture (piospheres soil) ( $2.5 \pm 0.5$  kg N ha<sup>-1</sup> a<sup>-1</sup>) to N leached from manure left on piospheres ( $7.7 \pm 7.7$  kg N ha<sup>-1</sup> a<sup>-1</sup>)

**Figure S1.** Flow diagram depicting the methodology followed in this study.

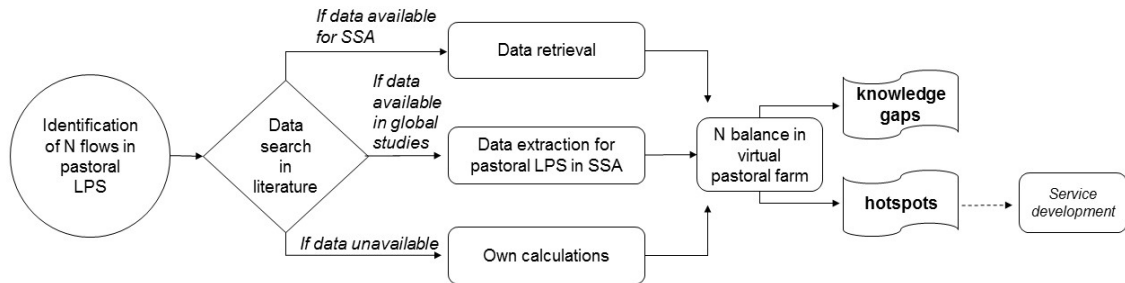

**Figure S2.** Geographic distribution of livestock only rangeland based (LGA) systems in arid/semi-arid sub-Saharan Africa (Seré and Steinfeld 1996) in yellow. Soil profiles selected from the Africa soil profiles database (Leenaars 2013) are represented by pink dots, and Kapiti Research Station in Kenya is shown in green. Base map source: FAO GeoNetwork (<http://www.fao.org/geonetwork/>)

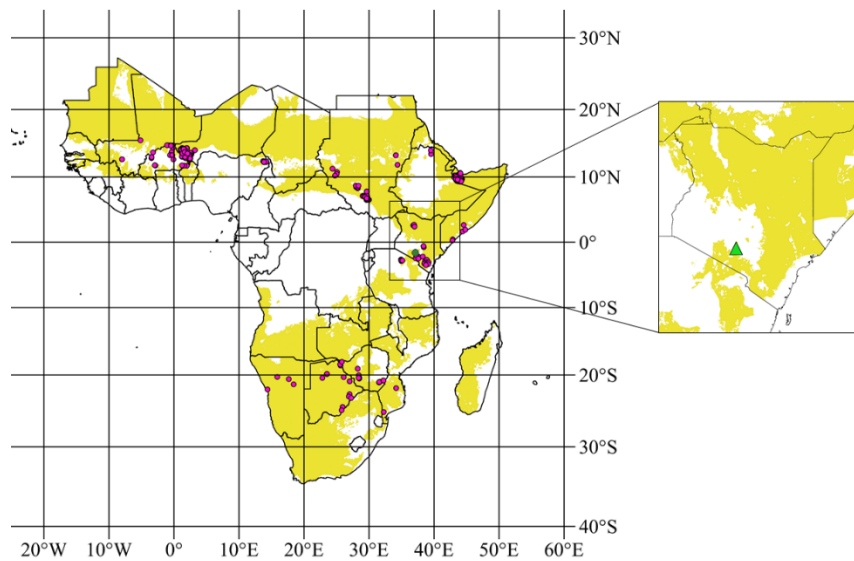

**Figure S3.** Procedure implemented for estimating N<sub>2</sub>O and NH<sub>3</sub> losses from cattle excretions ((Delon et al. 2010). <sup>a</sup>N excreted in dry or wet seasons, <sup>b</sup> 50% grazing, 40% in bomas and 10% around waterholes, <sup>c</sup> volatilization rates for N<sub>2</sub>O and NH<sub>3</sub>)

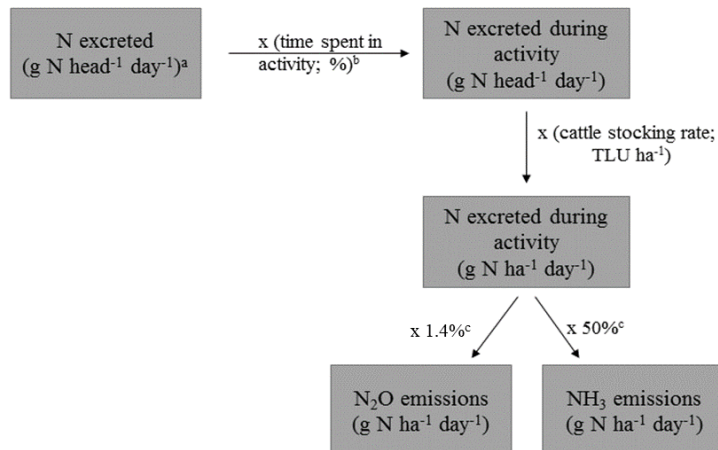

## References

- Andrew, M. H. 1988. Grazing Impact in Relation Watering Points Livestock. Trends in Ecology & Evolution **3**:336–339.
- Brümmer, C., N. Brüggemann, K. Butterbach-Bahl, U. Falk, J. Szarzynski, K. Vielhauer, R. Wassmann, and H. Papen. 2008. Soil-atmosphere exchange of N<sub>2</sub>O and NO in near-natural savanna and agricultural land in Burkina Faso (W. Africa). Ecosystems **11**:582–600.
- Cai Y., H. Akiyama. 2016. Nitrogen loss factors of trace gas emissions and leaching from excreta patches in grassland ecosystems: A summary of available data. Science of the Total Environment **572**:185-195.



- Chen, Y., J. T. Randerson, G. R. Van der Werf, D. C. Morton, M. Mu, and P. S. Kasibhatla. 2010. Nitrogen deposition in tropical forests from savanna and deforestation fires. *Global Change Biology* **16**:2024–2038.
- Cleveland, C. C., A. R. Townsend, D. S. Schimel, H. Fisher, L. O. Hedin, S. Perakis, E. F. Latty, C. Von Fischer, A. Elseroad, and M. F. Wasson. 1999. Global patterns of terrestrial biological nitrogen (N<sub>2</sub>) fixation in natural ecosystems. *Global Biogeochemical Cycles* **13**:623–645.
- Davidson, E. A. 2009. The contribution of manure and fertilizer nitrogen to atmospheric nitrous oxide since 1860. *Nature Geoscience* **2**:659–662.
- Delon, C., M. Adon, C. Liousse, and D. Serc. 2012. Nitrogen compounds emission and deposition in West African ecosystems : comparison between wet and dry savanna. *Biogeosciences* **9**:385–402.
- Delon, C., C. Galy-Lacaux, A. Boone, C. Liousse, D. Serça, M. Adon, B. Diop, A. Akpo, F. Lavenu, E. Mougin, and F. Timouk. 2010. Atmospheric nitrogen budget in Sahelian dry savannas. *Atmospheric Chemistry and Physics Discussions* **9**:14189–14233.
- Delon, C., C. Galy-lacaux, D. Serça, B. Loubet, N. Camara, E. Gardrat, I. Saneh, R. Fensholt, T. Tagesson, V. Le Dantec, B. Sambou, C. Diop, and E. Mougin. 2017. Soil and vegetation-atmosphere exchange of NO, NH<sub>3</sub>, and N<sub>2</sub>O from field measurements in a semi arid grazed ecosystem in Senegal. *Atmospheric Environment* **156**:36–51.
- Dentener, F. J. 2006. Global Maps of Atmospheric Nitrogen Deposition, 1860, 1993, and 2050. ORNL DAAC, Oak Ridge, Tennessee, USA. **DOI: 10.3334/ORNLDAAC/830**

- Farmer, E., and J. Mbwika. 2012. End market analysis of Kenyan livestock and meat: a desk study. USAID microreport 184.
- Fisher, J. B., K. P. Tu, and D. D. Baldocchi. 2008. Global estimates of the land-atmosphere water flux based on monthly AVHRR and ISLSCP-II data, validated at 16 FLUXNET sites. *Remote Sensing of Environment* **112**:901–919.
- Galy-Lacaux, C., and C. Delon. 2014. Nitrogen emission and deposition budget in West and Central Africa. *Environmental Research Letters* **9**:125002.
- Houlton, B. Z., Y.-P. Wang, P. M. Vitousek, and C. B. Field. 2008. A unifying framework for dinitrogen fixation in the terrestrial biosphere. *Nature* **454**:327–330.
- IPCC 2019. 2019 Refinement to the 2006 IPCC Guidelines for National Greenhouse Gas Inventories. Calvo, E., K. Tanabe, A. Kranjc, J. Baasansuren, M. Fukuda, S. Ngarize, A. Osako, Y. Pyrozhenko, P. Shermanau, and S. Federici (eds.). IPCC, Switzerland.
- Jarvis, S. C., and B. F. Pain. 1994. Greenhouse gas emissions from intensive livestock systems: their estimation and technologies for reduction. In White, D. H., S. M. Howden (eds.), *Climate Change: Significance for Agriculture and Forestry* 27–38. Springer.
- Leenaars, J. G. B. 2013. Africa Soil Profiles Database, Version 1.1. A compilation of georeferenced and standardised legacy soil profile data for Sub-Saharan Africa (with dataset). Africa Soil Information Service (AfSIS) project. ISRIC-World Soil Information. DOI: 10.13140/2.1.2279.6489.
- Levine, J. S., E. L. Winstead, D. A. B. Parsons, M. C. Scholes, R. J. Scholes, W. R. Cofer, D. R. Cahoon, and D. I. Sebacher. 1996. Biogenic soil emissions of nitric oxide (NO) and nitrous oxide (N<sub>2</sub>O) from savannas in South Africa: the impact

of wetting and burning. *Journal of Geophysical Research: Atmospheres* **101**:23689–23697.

- Meixner, F. X., Th. Fickinger, L. Marufu, D. Serça, F. J. Nathaus, E. Makina, L. Mukurumbira, and M. O. Andreae. 1997. Preliminary results on nitric oxide emission from a southern African savanna ecosystem. *Nutrient Cycling in Agroecosystems* **48**:123–138.
- Otte, M. J., and P. Chilonda. 2002. Cattle and small ruminant production systems in sub-Saharan Africa. A systematic review. Livestock Information Sector Analysis and Policy Branch, FAO Agriculture Department.  
<http://www.fao.org/3/a-y4176e.pdf>
- Otter, L. B., W. X. Yang, M. C. Scholes, and F. X. Meixner. 1999. Nitric oxide emissions from a southern African savanna. *Journal of Geophysical Research: Atmospheres* **104**:18471–18485.
- Rees, R. M., M. Wuta, P. A. Furley, and C. Li. 2006. Nitrous oxide fluxes from savanna (miombo) woodlands in Zimbabwe. *Journal of Biogeography* **33**:424–437.
- Robertson, G. P., and T. Rosswall. 1986. Nitrogen in West Africa: the regional cycle. *Ecological Monographs* **56**:43–72.
- Rufino, M. C., E. C. Rowe, R. J. Delve, and K. E. Giller. 2006. Nitrogen cycling efficiencies through resource-poor African crop-livestock systems. *Agriculture, Ecosystems and Environment* **112**:261–282.
- Satter, L. D., and R. E. Roffler. 1975. Nitrogen requirement and utilization in dairy cattle. *Journal of Dairy Science* **58**:1219–1237.
- Schlesinger, W. H. 2009. On the fate of anthropogenic nitrogen. *Proceedings of the National Academy of Sciences of the United States of America* **106**:203–208.

- Schlecht, E., F. Mahler, M. Sangaré, A. Susenbeth, and K. Becker. 1995. Quantitative and qualitative estimation of nutrient intake and faecal excretion of zebu cattle grazing natural pasture in semi-arid Mali. International Conference on Livestock and Sustainable Nutrient Cycling in Mixed Farming Systems of Sub-Saharan Africa, Addis Ababa, Ethiopia, 22-26 Nov 1993. International Livestock Centre for Africa.
- Scholes, M. C., R. Martin, R. J. Scholes, D. Parsons, and E. Winstead. 1997. NO and N<sub>2</sub>O emissions from savanna soils following the first simulated rains of the season. *Nutrient Cycling in Agroecosystems* **48**:115–122.
- Séré, C., and H. Steinfeld. 1996. World livestock production systems: Current status, issues and trends. FAO Animal Production and Health Paper No. 127.
- Siemens J. and M. Kaupenjohann. 2002. Contribution of dissolved organic nitrogen to N leaching from four German agricultural soils. *Journal of Plant Nutrition and Soil Science* **165**:675-681.
- Syrstad, O. 1993. Evaluation of dual-purpose (milk and meat) animals. *World Animal Review* **77**:56–59.
- Wachendorf C., F. Taube and M. Wachendorf. 2005. Nitrogen leaching from <sup>15</sup>N labelled cow urine and dung applied to grassland on a sandy soil. *Nutrient cycling in Agroecosystems* **73**:89-100.
